# Supplementary material for: Wintertime Spatial Distribution of Ammonia and its Emission Sources in the Great Salt Lake Region
Source: Copernicus journal article supplement (doi:10.5194/acp-2019-266), 2019-05-21
Supplement: Supplementary file 1 [file acp-2019-266-supplement.pdf]

## Supplementary Information for:

# Wintertime Spatial Distribution of Ammonia and its Emission Sources in the Great Salt Lake Region

5

Alexander Moravek<sup>1</sup>, Jennifer G. Murphy<sup>1</sup>, Amy Hrdina<sup>1</sup>, John C. Lin<sup>2</sup>, Christopher Pennell<sup>3</sup>, Alessandro Franchin<sup>4,5</sup>, Ann M. Middlebrook<sup>5</sup>, Dorothy Fibiger<sup>4,5\*</sup>, Caroline C. Womack<sup>4,5</sup>, Erin E. McDuffie<sup>4,5,6\*\*</sup>, Randal Martin<sup>7</sup>, Kori Moore<sup>7\*\*\*</sup>, Munkhbayar Baasandorj<sup>2,3</sup>, and Steven S. Brown<sup>5,6</sup>

<sup>1</sup>Department of Chemistry, University of Toronto, Toronto, ON, M5S 3H6, Canada

10 <sup>2</sup>Department of Atmospheric Sciences, University of Utah, Salt Lake City, UT, 84112, USA

<sup>3</sup>Division of Air Quality, Utah Department of Environmental Quality, Salt Lake City, UT, 84114, USA

<sup>4</sup>Cooperative Institute for Research in Environmental Sciences (CIRES), University of Colorado, Boulder, CO, 80309, USA

<sup>5</sup>NOAA Earth System Research Laboratory (ESRL) Chemical Sciences Division, Boulder, CO, 80305, USA

<sup>6</sup>Department of Chemistry, University of Colorado, Boulder, CO, 80309, USA

15 <sup>7</sup>Department of Civil and Environmental Engineering, Utah State University, Logan, UT, 84322, USA

\*Now at California Air Resources Board, Sacramento, CA, 95814, USA

\*\*Now at Department of Physics and Atmospheric Science, Dalhousie University, Halifax, NS, B2H 4R2, Canada

\*\*\*Now at Space Dynamics Laboratory, Logan, UT, 84341, USA

20 *Correspondence to:* Alexander Moravek (a.moravek@utoronto.ca)

### Content:

#### S1 Study area

#### S2 Observations of NH<sub>3</sub> from Twin Otter aircraft

25 S2.1 Surface level NH<sub>3</sub> from Twin Otter (missed approaches)

S2.2 Ground site and Twin Otter comparison

#### S3 UDAQ emission inventory

#### S4 USU inventory

#### S5 Footprint model

30 S5.1 Modelled and measured NH<sub>x</sub> enhancements

S5.2 Comparison with modelled and measured NO<sub>y</sub> enhancements

S5.3 Background mixing ratio determination

#### S6 Inter-valley exchange

#### S7 Source apportionment

35 **References**

## Section S1 Study area

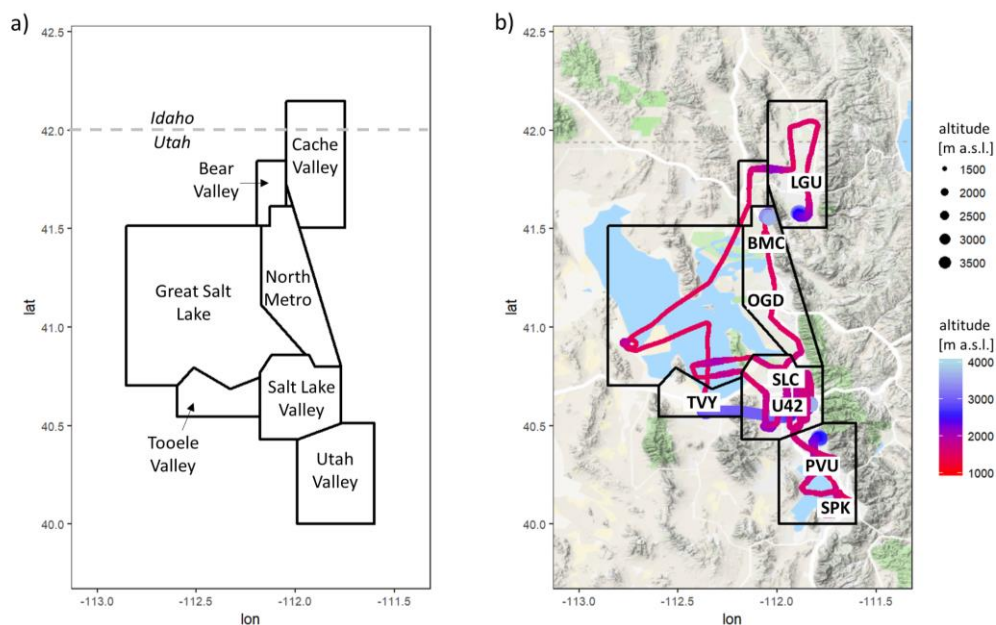

5 **Figure S1: Overview of the study area: a) Division into sub-regions used for the analysis of Twin Otter measurements. b) Location of a typical flight path within the defined sub-regions. The flightpath is color-coded by the flight altitude, labels show the location of the Salt Lake City International Airport (SLC) and the airports for missed approaches (OGD = Ogden-Hinckley Airport, BMC = Brigham City Municipal Airport, LGU = Logan-Cache Airport, TVY = Tooele Valley Airport, U42 = South Valley Regional Airport, PVU = Provo Municipal Airport, SPK = Spanish Fork-Springville Airport).**

## Section S2 Observations of NH<sub>3</sub> from Twin Otter aircraft

### Section S2.1 Surface level NH<sub>3</sub> from Twin Otter (missed approaches)

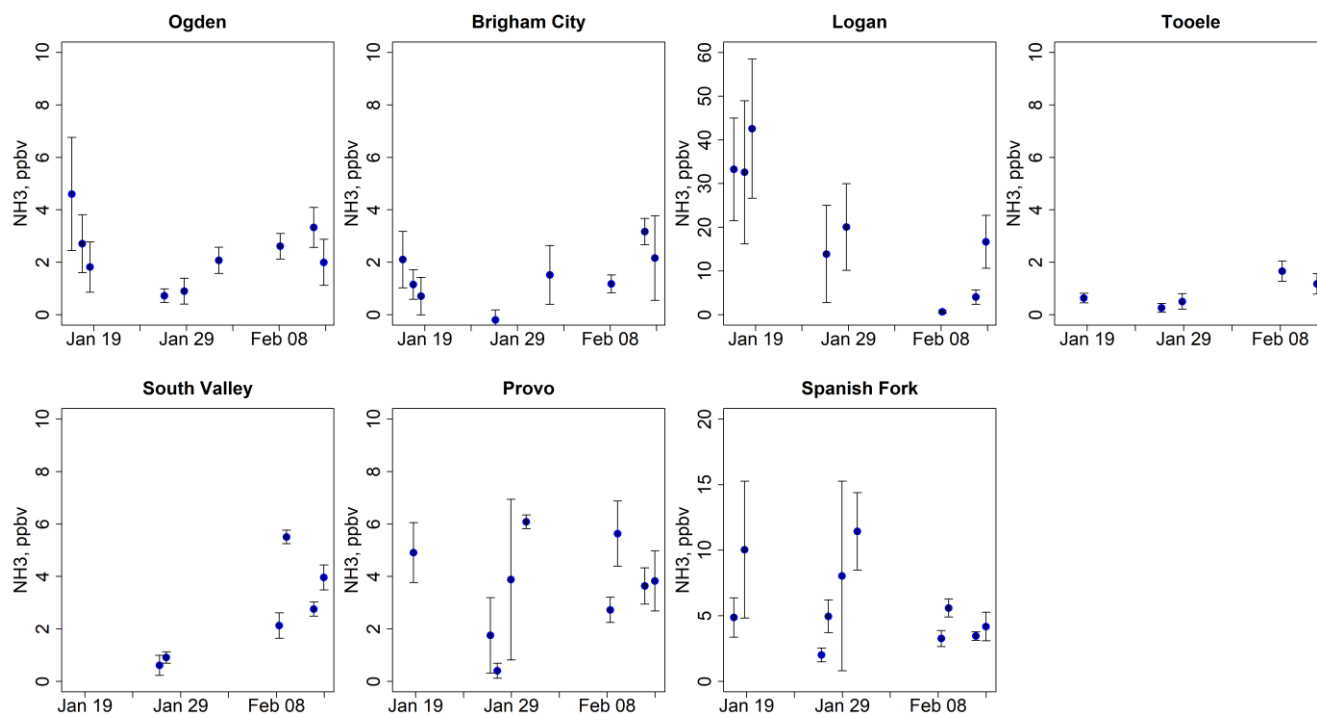

5 **Figure S2: Mean NH<sub>3</sub> mixing ratios (+ standard deviation) during missed approaches. NH<sub>3</sub> mixing measured over the airport runway, extended by 0.01° latitude to North and South and by 0.01° longitude to West and East, were taken into account. Airports: OGD = Ogdenville-Hinckley Airport, BMC = Brigham City Municipal Airport, LGU = Logan-Cache Airport, TVY = Tooele Valley Airport, U42 = South Valley Regional Airport, PVU = Provo Municipal Airport, SPK = Spanish Fork-Springville Airport.**

## Section S2.2 Ground site and Twin Otter comparison

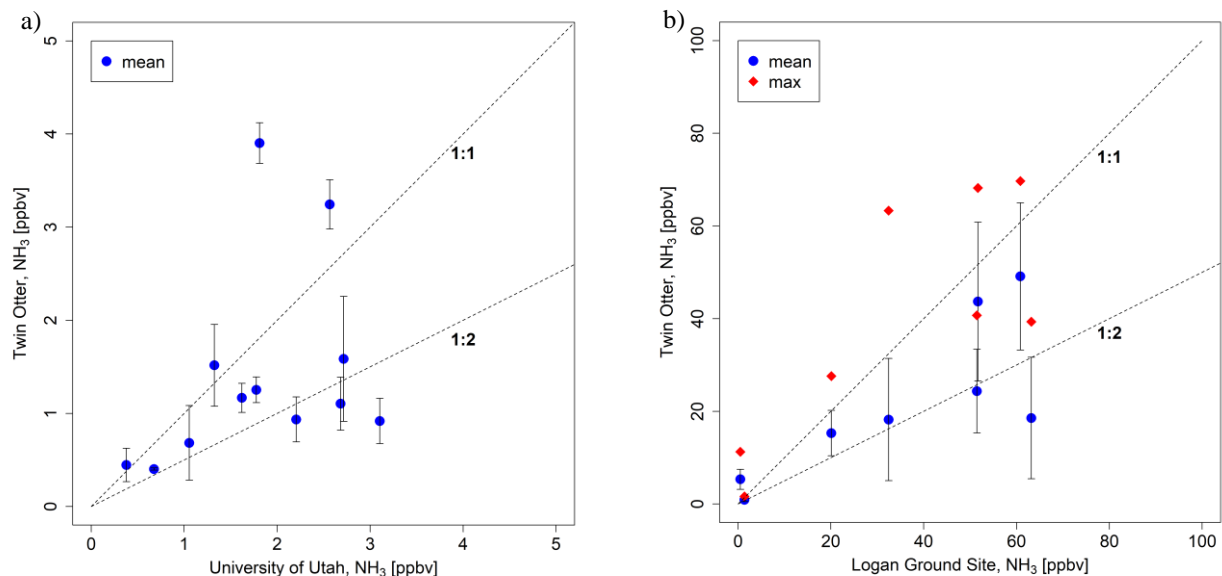

**Figure S3: Comparison of NH<sub>3</sub> mixing ratios between Twin Otter and ground site observations. a) Comparison with the University of Utah ground site: NH<sub>3</sub> mixing ratios were averaged when the Twin Otter was overflying the ground site within a distance of 1 km before and after passing the ground site. b) Comparison with the Logan ground site: Twin Otter data shown represents the missed approaches at Logan airport, located approximately 3 km NW of the Logan ground site. Mean values (blue dots, with standard deviations) are the average NH<sub>3</sub> mixing ratios between 1 km before and 1 km after the start and end of the runway. Maximum values (red diamonds) were observed directly above the runway and are most representative for the NH<sub>3</sub> mixing ratios at ground level.**

## Section S3 UDAQ emission inventory

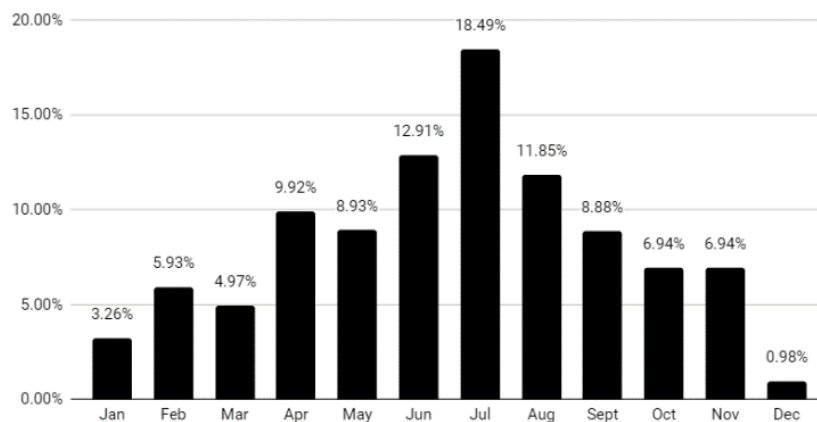

- 5 **Figure S4: Monthly temporal profile of NH<sub>3</sub> livestock emissions used in the UDAQ emission inventory. The monthly profile redistributes the annual total NEI emissions over the year and is determined through inverse modelling as described in Gilliland et al. (2006).**

## Section S4 USU inventory

**Table S1: Utah State University (USU) NH<sub>3</sub> emission inventory for Cache Valley and separated by county (Moore, 2007). Percentages may not sum to 100.0 due to rounding.**

| SOURCE          | CACHE COUNTY   |             |                |             | FRANKLIN COUNTY |             |                |             | CACHE VALLEY (both counties) |              |                 |              |
|-----------------|----------------|-------------|----------------|-------------|-----------------|-------------|----------------|-------------|------------------------------|--------------|-----------------|--------------|
|                 | Winter         |             | Summer         |             | Winter          |             | Summer         |             | Winter                       |              | Summer          |              |
|                 | kg/d           | %           | kg/d           | %           | kg/d            | %           | kg/d           | %           | kg/d                         | %            | kg/d            | %            |
| Dairy cattle    | 4,495.9        | 82.4        | 4,495.9        | 83.1        | 6,252.5         | 89.6        | 6,252.5        | 90          | 10,748.4                     | 86.4         | 10,748.4        | 87           |
| Beef cattle     | 143            | 2.6         | 98.2           | 1.8         | 82.9            | 1.2         | 49.7           | 0.7         | 225.9                        | 1.8          | 147.9           | 1.2          |
| Swine           | 54.7           | 1           | 54.7           | 1           | 13.8            | 0.2         | 13.8           | 0.2         | 68.5                         | 0.6          | 68.5            | 0.6          |
| Poultry         | 546.7          | 10          | 546.7          | 10.1        | 609             | 8.7         | 609            | 8.8         | 1,155.7                      | 9.3          | 1,155.7         | 9.4          |
| <i>Subtotal</i> | <i>5,240.3</i> | <i>96</i>   | <i>5,195.5</i> | <i>96</i>   | <i>6,958.2</i>  | <i>99.7</i> | <i>6,925.0</i> | <i>99.7</i> | <i>12,198.5</i>              | <i>98.1</i>  | <i>12,120.5</i> | <i>98.2</i>  |
| Automobiles     | 196.7          | 3.6         | 196.7          | 3.6         | 21.6            | 0.3         | 21.6           | 0.3         | 218.3                        | 1.8          | 218.3           | 1.8          |
| Industry/WWTP   | 18.1           | 0.3         | 18.1           | 0.3         | 0.05            | <0.1        | 0.05           | <0.1        | 18.2                         | 0.2          | 18.2            | 0.2          |
| <i>Total</i>    | <i>5,455.0</i> | <i>99.9</i> | <i>5,410.2</i> | <i>99.9</i> | <i>6,979.9</i>  | <i>100</i>  | <i>6,946.7</i> | <i>100</i>  | <i>12,434.9</i>              | <i>100.1</i> | <i>12,357.0</i> | <i>100.2</i> |

5

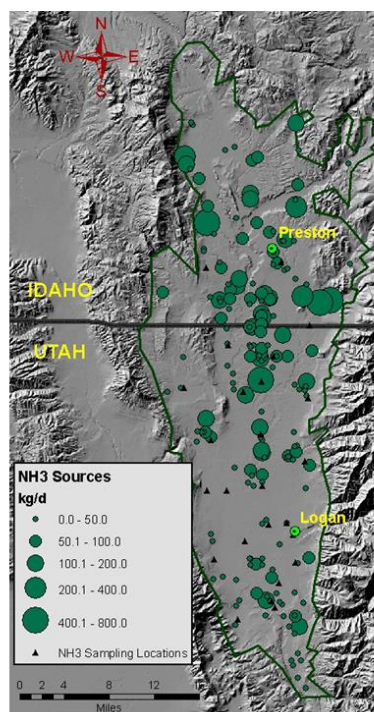

**Figure S5: Map overlay of NH<sub>3</sub> sources in Cache Valley used in the Utah State University (USU) NH<sub>3</sub> emission inventory (Moore, 2007).**

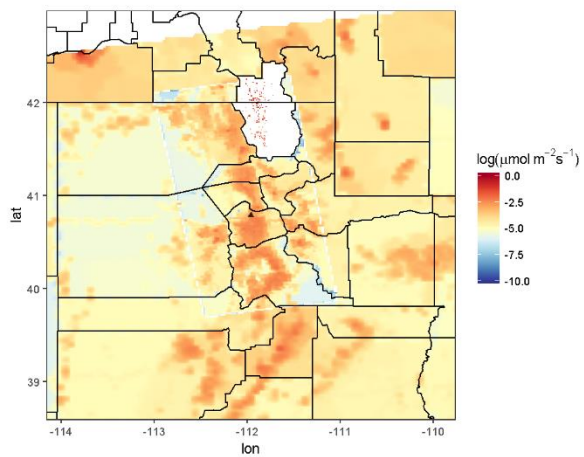

**Figure S6: Emission inventory map used in the footprint model approach, where emissions in Cache Valley are substituted by the USU  $\text{NH}_3$  emissions (white are with point sources).**

## Section S5 Footprint model

### Section S5.1 Modelled and measured $\text{NH}_x$ enhancements

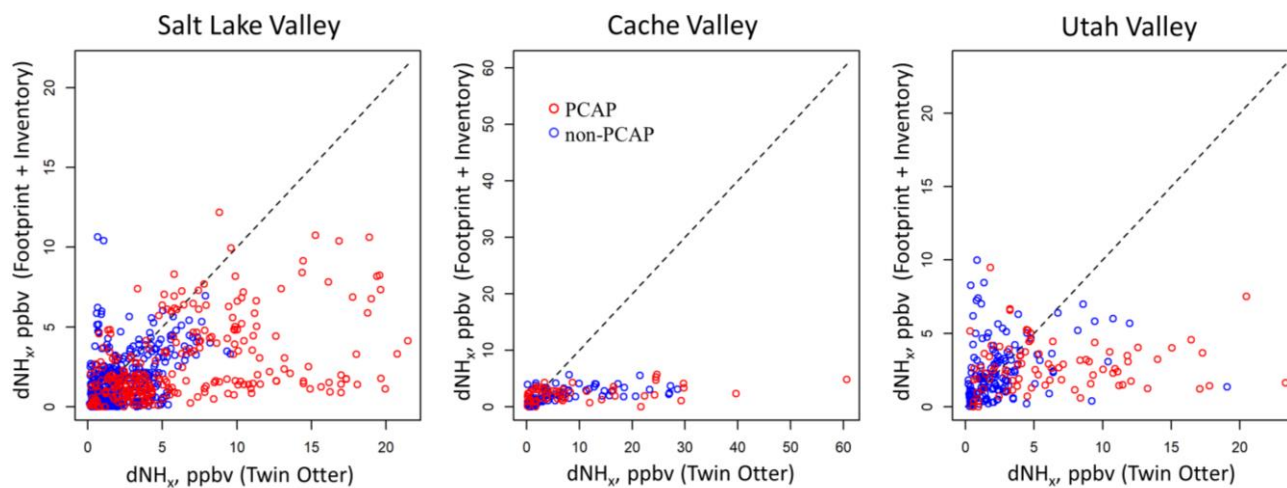

5 Figure S7. Modelled (Footprint + Inventory) vs. measured (Twin Otter)  $\text{NH}_x$  enhancements ( $\text{dNH}_x$ ) for Salt Lake Valley, Cache Valley and Utah Valley during PCAP (red) and non-PCAP period (blue).  $\text{NH}_3$  emission from gas furnace combustion and human perspiration were removed from the area sources sector of the original UDAQ  $\text{NH}_3$  emission inventory.



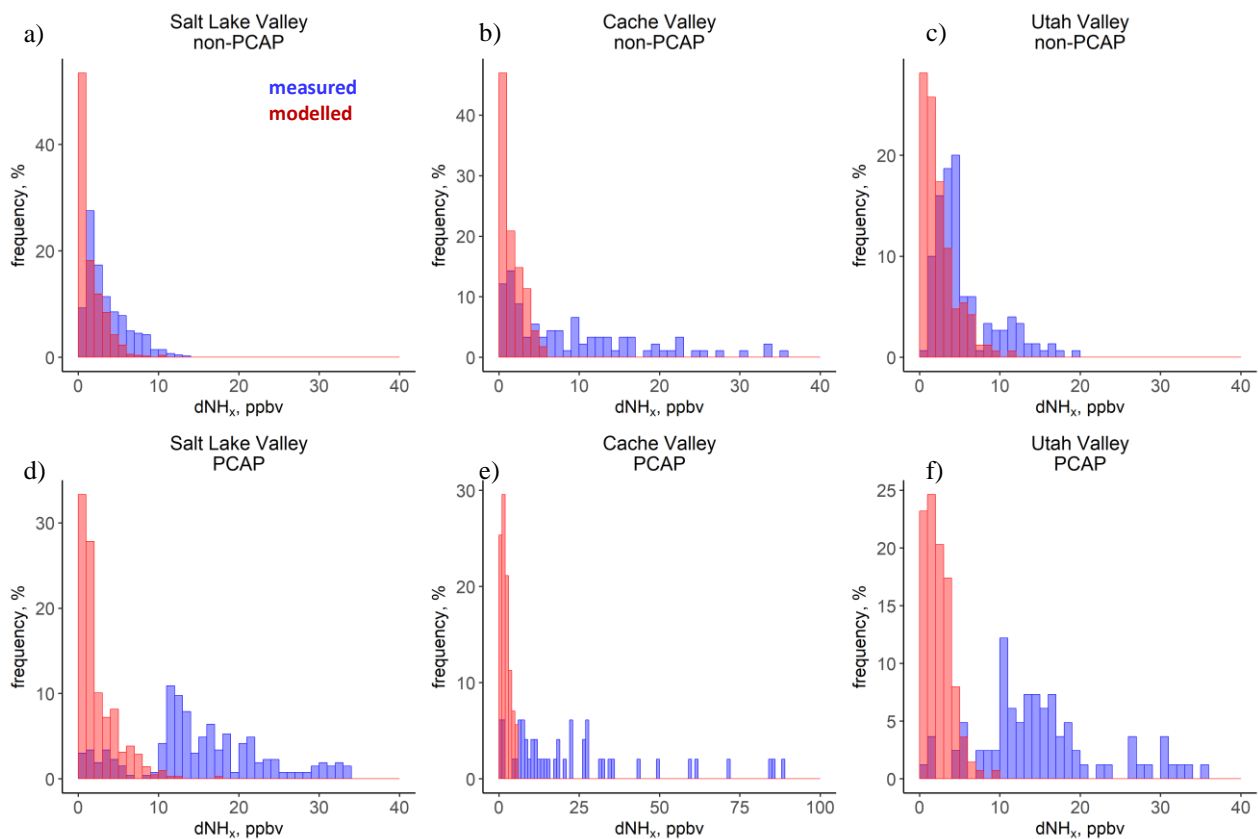

**Figure S8: Frequency distribution of measured (blue) and modelled (red)  $\text{NH}_x$  enhancements ( $\text{dNH}_x$ ) for Salt Lake Valley, Cache Valley and Utah Valley (x-axis is linear scale) for (a-c) non-PCAP and (d-f) PCAP conditions.**

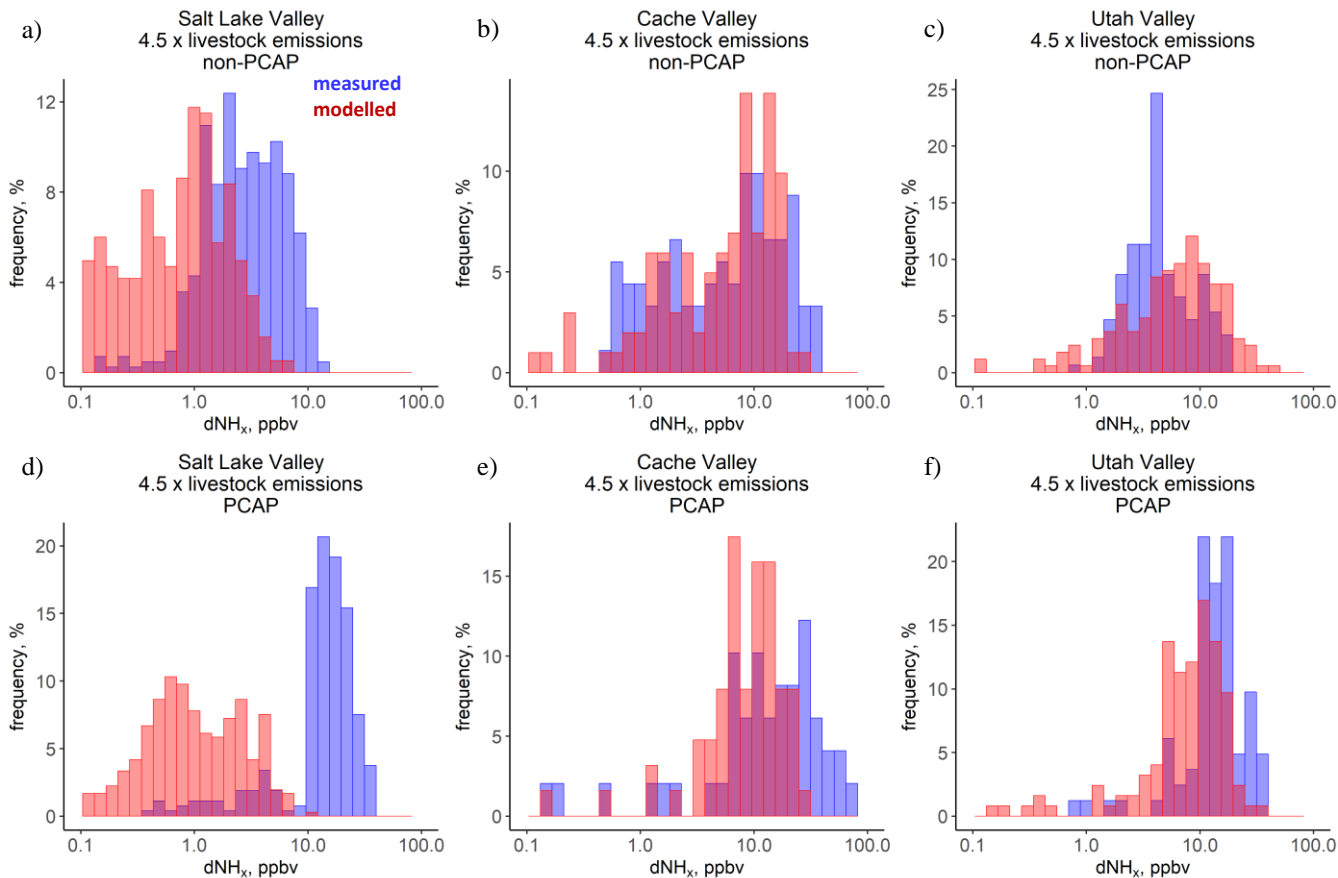

**Figure S9: Frequency distribution of measured (blue) and modelled (red)  $\text{NH}_x$  enhancements ( $\text{dNH}_x$ ) for Salt Lake Valley, Cache Valley and Utah Valley using enhanced livestock emissions by a factor of 4.5 for (a-c) non-PCAP and (d-f) PCAP conditions.**

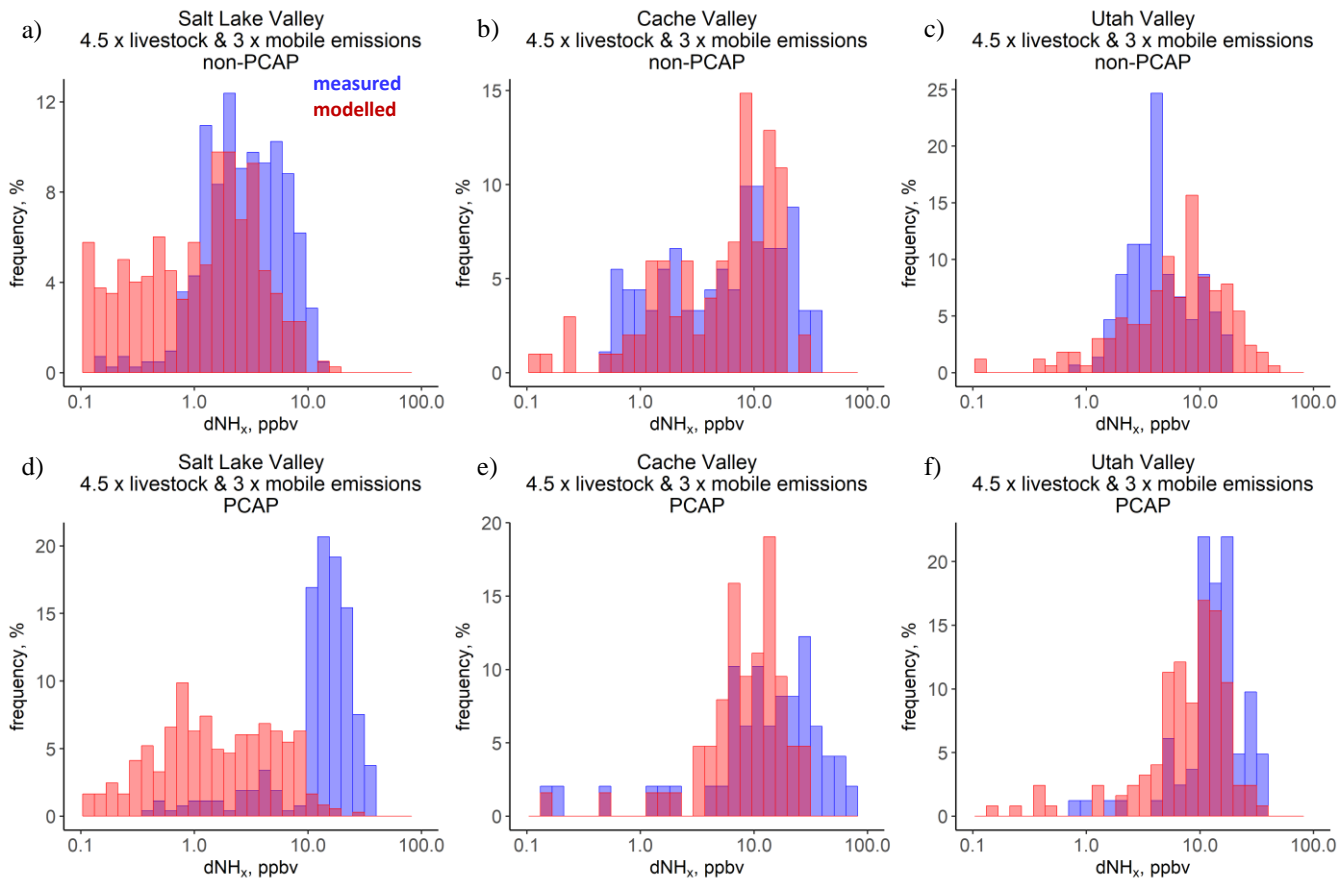

**Figure S10: Frequency distribution of measured (blue) and modelled (red)  $\text{NH}_x$  enhancements ( $\text{dNH}_x$ ) for Salt Lake Valley, Cache Valley and Utah Valley using enhanced livestock (factor of 4.5) and enhanced mobile (factor of 3) emissions for (a-c) non-PCAP and (d-f) PCAP conditions.**

5

10

15

|     | All      |                |                    | non-PCAP       |                |                    | PCAP     |                |                    |
|-----|----------|----------------|--------------------|----------------|----------------|--------------------|----------|----------------|--------------------|
|     | original | $f_{ls}$       | $f_{ls} + f_{mob}$ | original       | $f_{ls}$       | $f_{ls} + f_{mob}$ | original | $f_{ls}$       | $f_{ls} + f_{mob}$ |
| BV  | 4.2E-12  | -              | -                  | 1.5E-09        | -              | -                  | 4.5E-07  | -              | -                  |
| CV  | 9.7E-11  | <b>1.3E-01</b> | <b>1.1E-01</b>     | 3.2E-07        | <b>2.3E-01</b> | <b>2.1E-01</b>     | 3.7E-06  | <b>4.4E-01</b> | <b>4.0E-01</b>     |
| GSL | 2.2E-57  | -              | -                  | 6.5E-40        | -              | -                  | 1.6E-27  | -              | -                  |
| NM  | 1.4E-22  | -              | -                  | 7.2E-08        | -              | -                  | 1.0E-17  | -              | -                  |
| SLV | 4.8E-25  | 1.0E-75        | 1.5E-33            | 2.9E-10        | 1.9E-37        | 3.8E-15            | 2.4E-29  | 3.4E-54        | 2.6E-30            |
| TC  | 4.3E-11  | -              | -                  | 5.8E-08        | -              | -                  | 1.2E-04  | -              | -                  |
| UV  | 3.4E-03  | 8.9E-20        | 8.9E-20            | <b>4.9E-01</b> | 9.5E-23        | 4.2E-24            | 3.3E-11  | 1.4E-02        | 3.6E-03            |

**Table S2: p-values obtained from the Mann-Whitney-Wilcoxon test comparing modelled and measured  $dNH_x$  values. Shown are the results for the regions in the study area using all data and only data during non-PCAP and PCAP conditions. In addition, the effect of increasing livestock emissions by a constant factor ( $f_{ls} = 4.5$ ) and further increase of mobile emissions ( $f_{mob} = 3$ ) is illustrated for Cache Valley, Salt Lake Valley and Utah Valley. If the p-value is  $<0.05$ , the null hypothesis, that both modelled and measured data are drawn from same distribution, is rejected. Values in bold indicate cases where the null hypothesis is not rejected and therefore a similarity between modelled and measured distributions is likely.**

10

15

20

## Section S5.2 Comparison with modelled and measured $\text{NO}_y$ enhancements

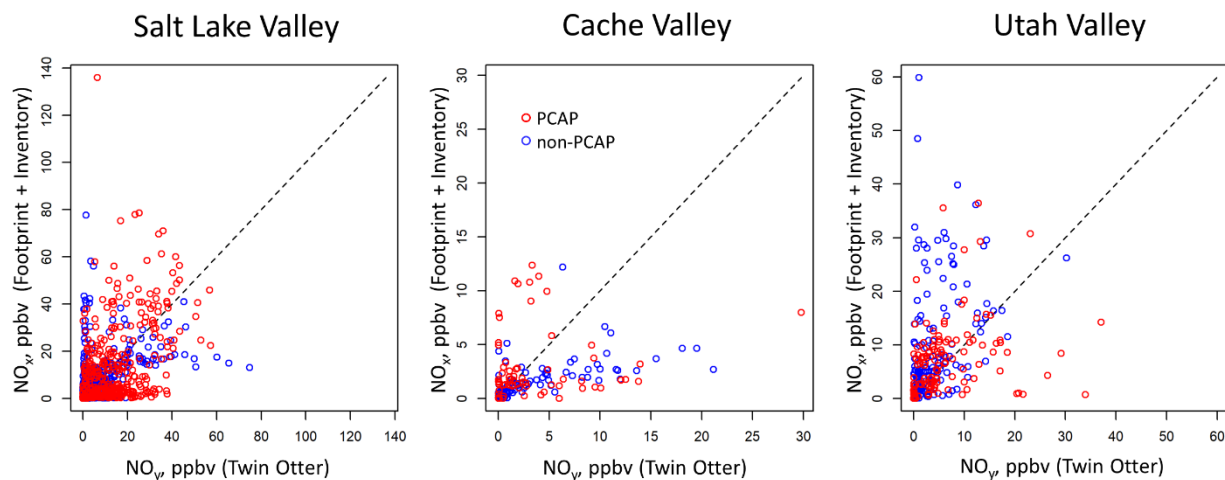

5 **Figure S11. Modelled (Footprint + Inventory) vs. measured (Twin Otter)  $\text{NO}_y$  enhancements ( $\text{dNO}_y$ ) for Salt Lake Valley, Cache Valley and Utah Valley during PCAP (red) and non-PCAP period (blue).**

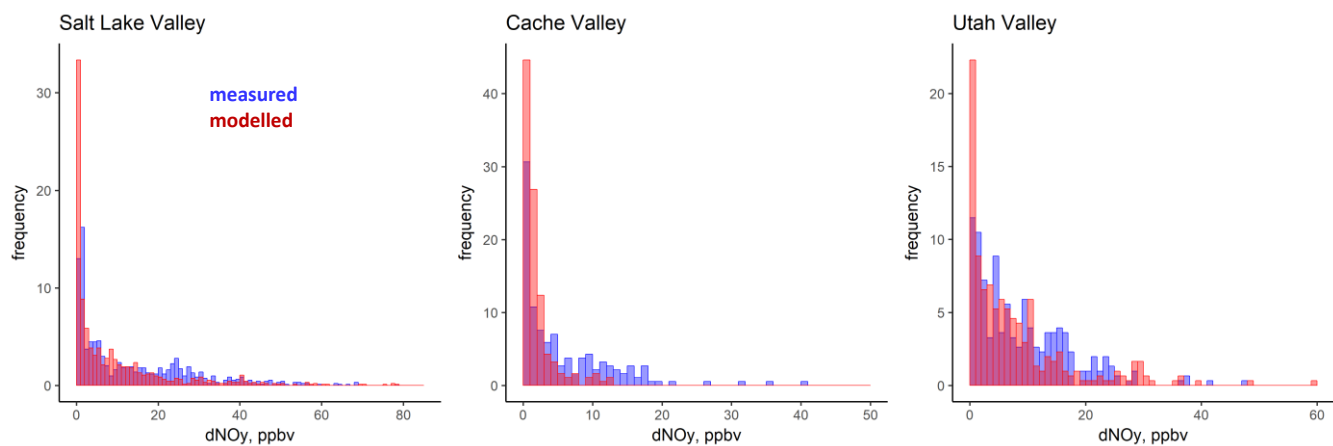

**Figure S12: Frequency distribution of measured (blue) and modelled (red)  $\text{NO}_y$  enhancements ( $\text{dNO}_y$ ) for Salt Lake Valley, Cache Valley and Utah Valley (x-axis is linear scale).**

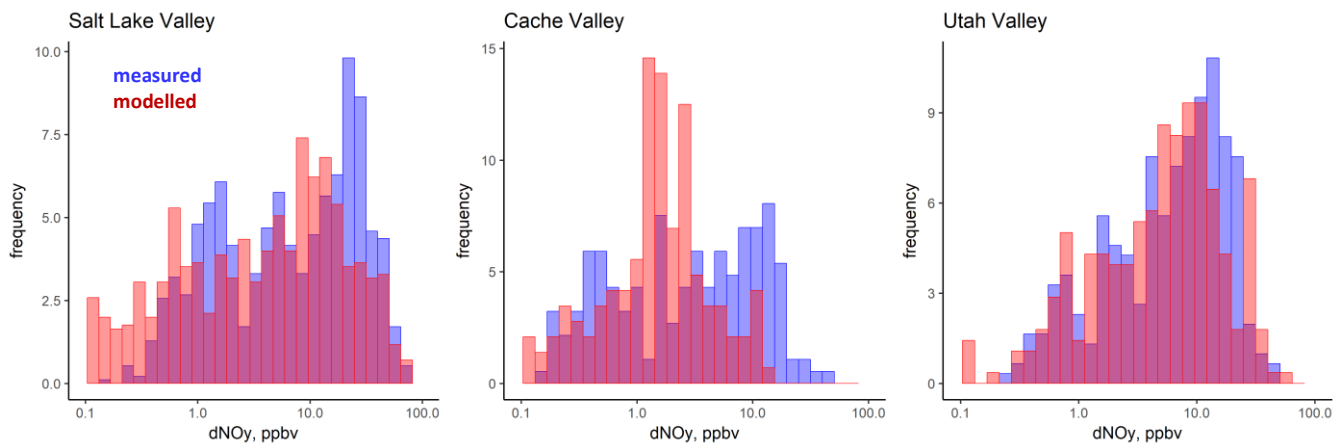

Figure S13: Frequency distribution of measured (blue) and modelled (red) NO<sub>y</sub> enhancements (dNO<sub>y</sub>) for Salt Lake Valley, Cache Valley and Utah Valley (x-axis is logarithmic scale).

## 5 Section S5.3 Background mixing ratio determination

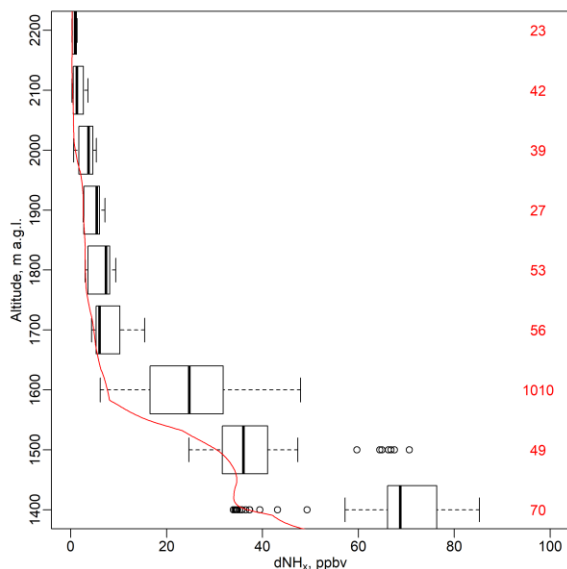

10 Figure S14: Example altitude profile for a research flight in Cache Valley used for the calculation of background mixing ratios. The red background profile was derived by calculating the moving 1<sup>st</sup> percentile (in 1-m altitude increments) with a layer depth of 50 m. In a second step, the 1<sup>st</sup> percentile altitude profile was further smoothed by a moving average (again in 1-m altitude increments and with a layer depth of 50 m). The shown boxplots visualize the variation of observed NH<sub>x</sub> with altitude. Since they are defined for layers of 100 m depth, they do not necessarily match with the calculated background profile. Red numbers are the number of measurement points available in each boxplot.

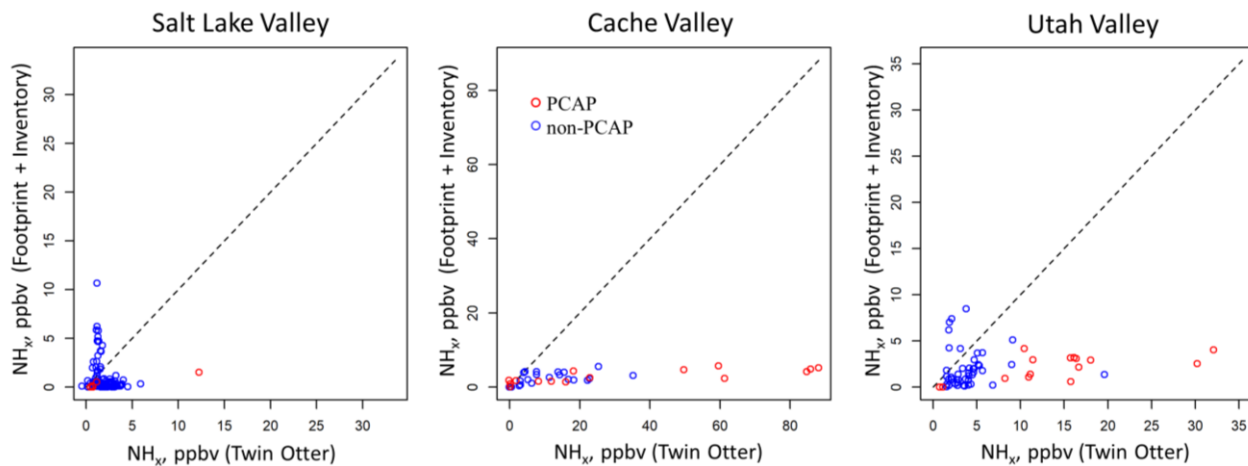

Figure S15 Modelled (Footprint + Inventory) vs. measured (Twin Otter)  $\text{NH}_x$  mixing ratios for Salt Lake Valley, Cache Valley and Utah Valley during PCAP (red) and non-PCAP period (blue).  $\text{NH}_3$  emission from gas furnace combustion and human perspiration were removed from the area sources sector of the original UDAQ  $\text{NH}_3$  emission inventory. In contrast to Figure S7, only those data point are shown where the back trajectories at the exit of the inventory domain met the following conditions: at least 180 out of the 200 trajectories originate in greater than 1000 m a.g.l. and/or UDAQ  $\text{NH}_3$  emission are below  $10^{-4} \mu\text{mol m}^{-2} \text{s}^{-1}$ . As a result it is assumed that the  $\text{NH}_3$  mixing ratio at the domain entry is zero ppb and the modelled  $\text{NH}_3$  values can be regarded as absolute mixing ratios instead of enhancements. For that reason, the background was mixing ratios was not subtracted from the measured  $\text{NH}_x$  values, representing absolute  $\text{NH}_3$  mixing ratios as well.

5

10

## Section S6 Inter-valley exchange

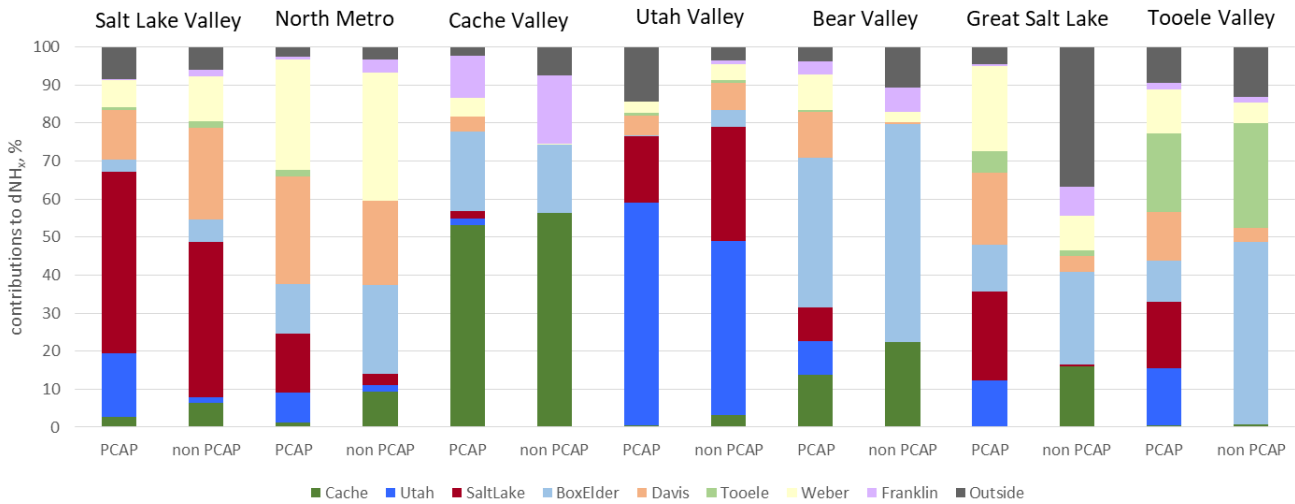

5 **Figure S16: Inter-valley exchange of NH<sub>x</sub>: Contributions from different counties to dNH<sub>x</sub> at the Twin Otter locations in all sub-regions of the study period. The inter-valley exchange was evaluated by segregating contributions from the footprint model (see contributions map in Figure 5 in main text) into counties of origin for each run of the footprint model (i.e. every 2 min of Twin Otter flight path).**

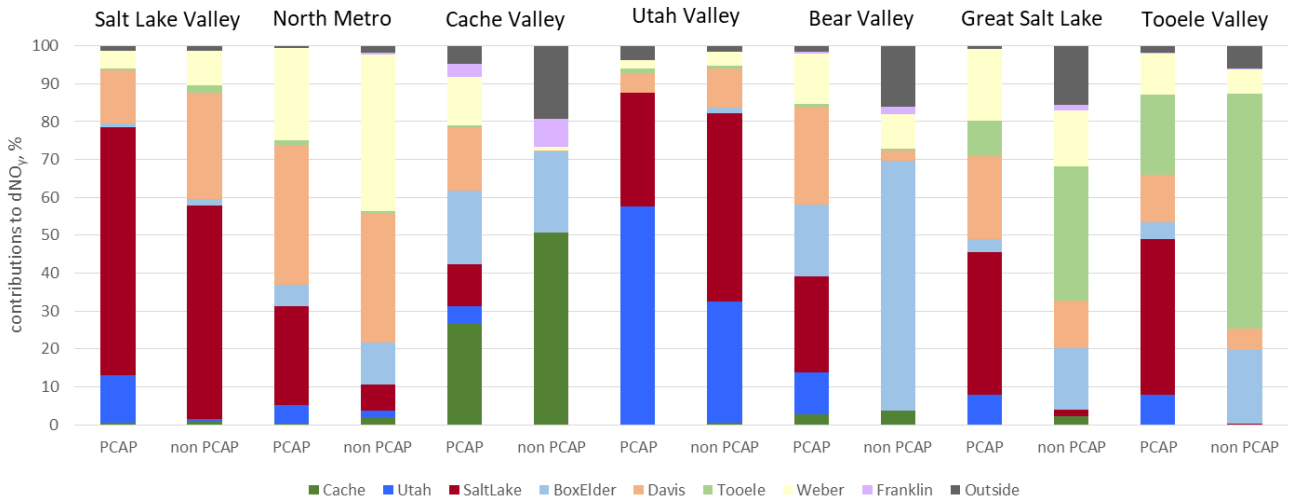

10 **Figure S17: Inter-valley exchange of NO<sub>y</sub>: Contributions from different counties to dNO<sub>y</sub> at the Twin Otter locations in all sub-regions of the study period. The inter-valley exchange was evaluated by segregating contributions from the footprint model (see contributions map in Figure 5 in main text) into counties of origin for each run of the footprint model (i.e. every 2 min of Twin Otter flight path).**



## Section S7 Source apportionment

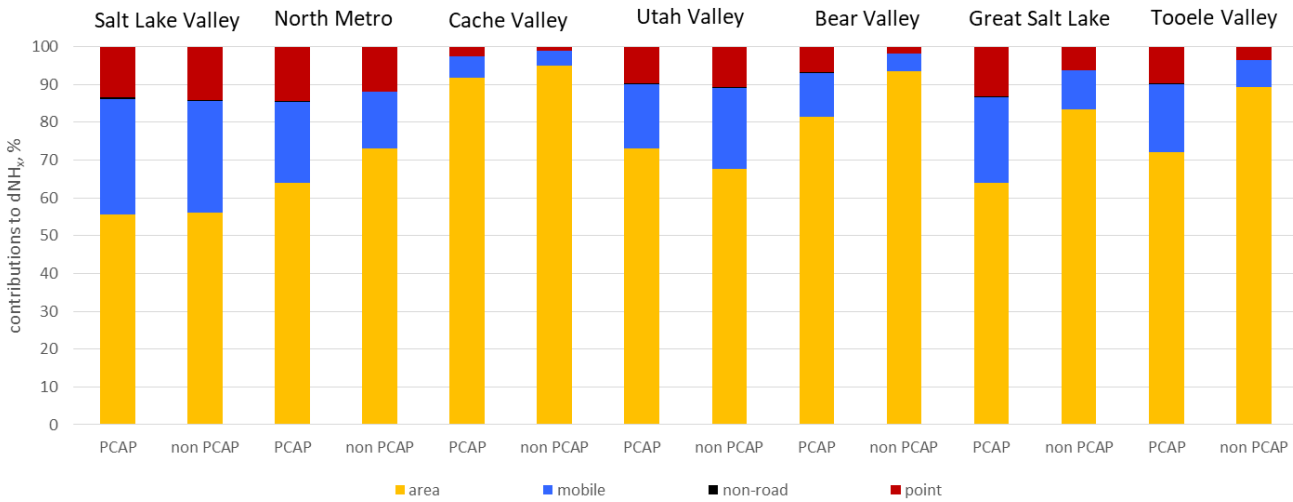

5 **Figure S18: Sector contribution to dNH<sub>x</sub>: Contributions from different emission sectors to dNH<sub>x</sub> at the Twin Otter locations in all sub-regions of the study period. For Salt Lake Valley, dNH<sub>x</sub> contributions from the area sector were by 10 % lower during PCAP and by 15 % lower during non-PCAP periods, when using the STIL footprints from the UU ground site. While point source contributions were approximately the same, contributions from area sources were higher by that value.**

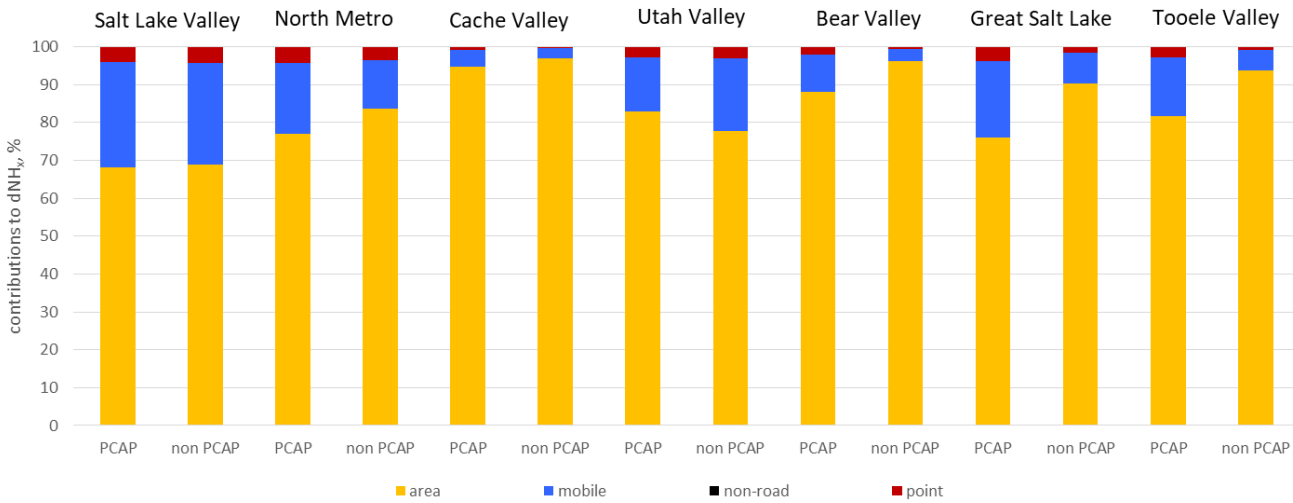

10 **Figure S19: Sector contribution to dNH<sub>x</sub> (scaled emissions): Contributions from different emission sectors to dNH<sub>x</sub> at the Twin Otter locations in all sub-regions of the study period. To account for the observed underestimation of emission sources in the UDAQ inventory, area source and mobile emissions were increased by a factor 4.5 and 3, respectively.**

## References

- Gilliland, A. B., Wyatt Appel, K., Pinder, R. W., & Dennis, R. L. (2006). Seasonal NH<sub>3</sub> emissions for the continental United States: Inverse model estimation and evaluation. *Atmospheric Environment*, *40*(26), 4986–4998.  
<https://doi.org/10.1016/j.atmosenv.2005.12.066>
- 5 Moore, K. D. (2007). *Derivation of agricultural gas-phase ammonia emissions and application to the Cache Valley*. Utah State University, Logan, UT.
